# Supplementary material for: Reduced neural activity but improved coding in rodent higher-order visual cortex during locomotion
Source: Nat Commun. 2022 Mar 30;13:1676. doi: 10.1038/s41467-022-29200-z (PMC8967903; doi:10.1038/s41467-022-29200-z)
Supplement: Supplementary file 1 — Supplementary Information [file 41467_2022_29200_MOESM1_ESM.pdf]

## Supplementary Information

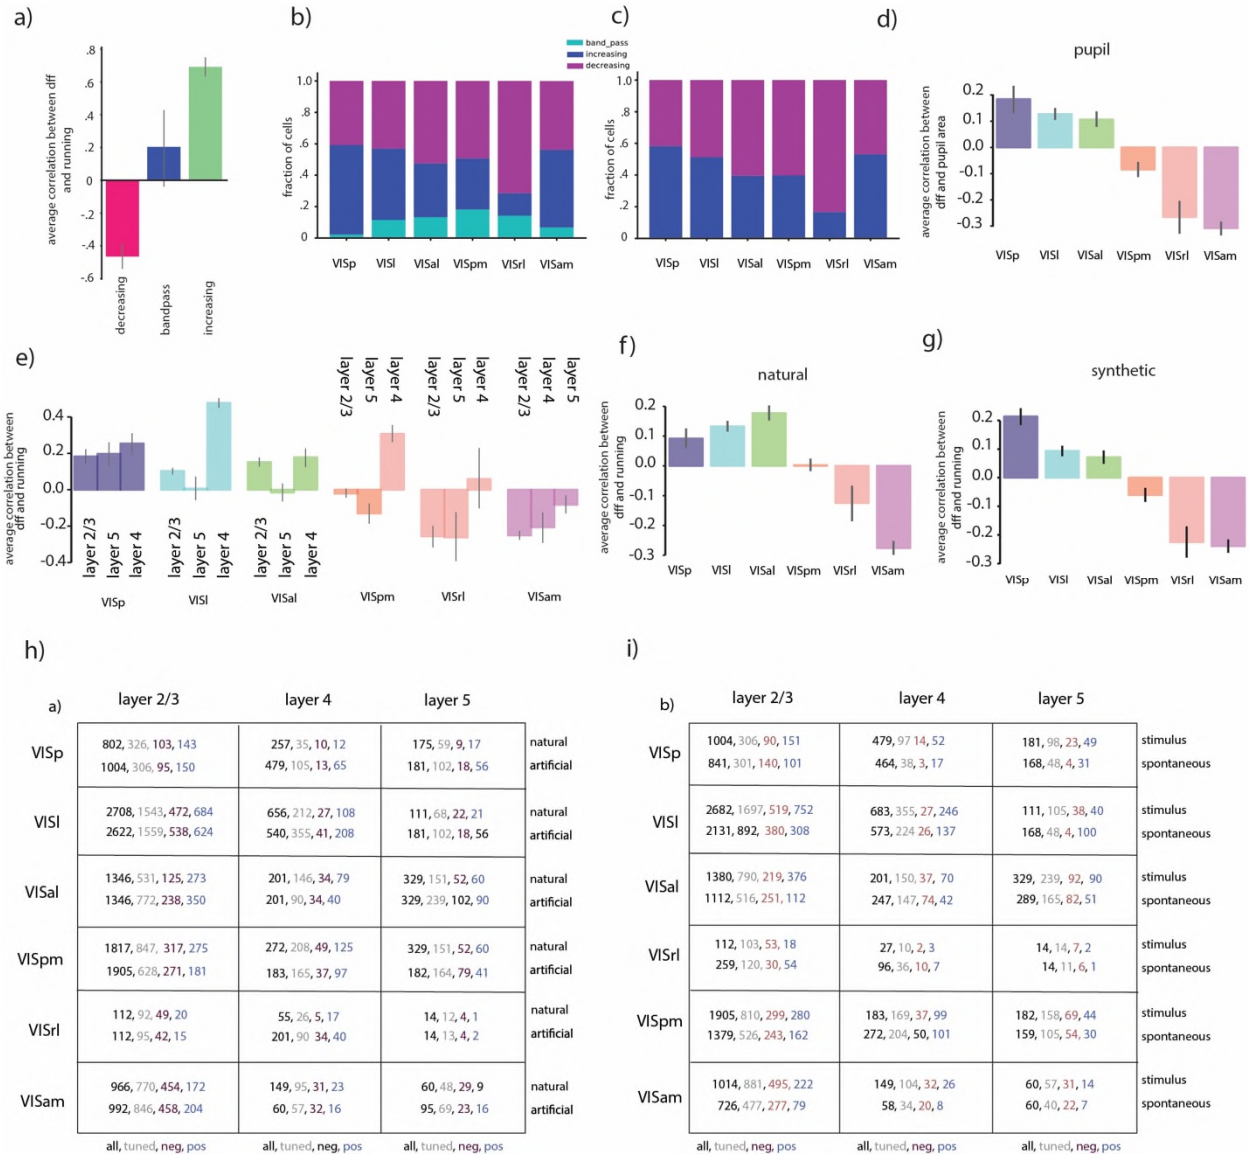

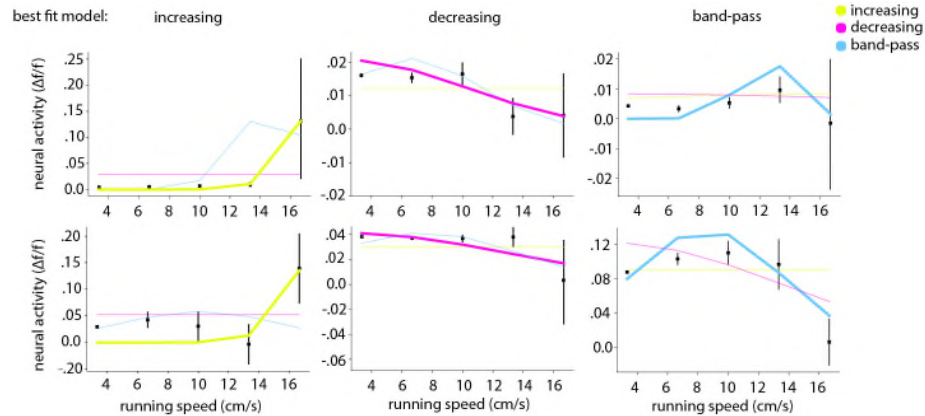

**Supplemental Figure 2.** Examples of cells whose activity are best fit by increasing, decreasing, and band-pass gaussian models, respectively. In each plot the average neural activity (in black), and all fit models (yellow, pink, and blue) are shown. Plotted neural data are from a held-out test set, model fits are the MLE model from the training set. Best fit model was determined by lowest residual on the test set, across 10 cross-validation folds. All cells are from layer 2/3 of primary visual cortex. Models were fit on data collected while any of the visual stimuli were presented. **Error bars are standard error margin for observed running speed data.**

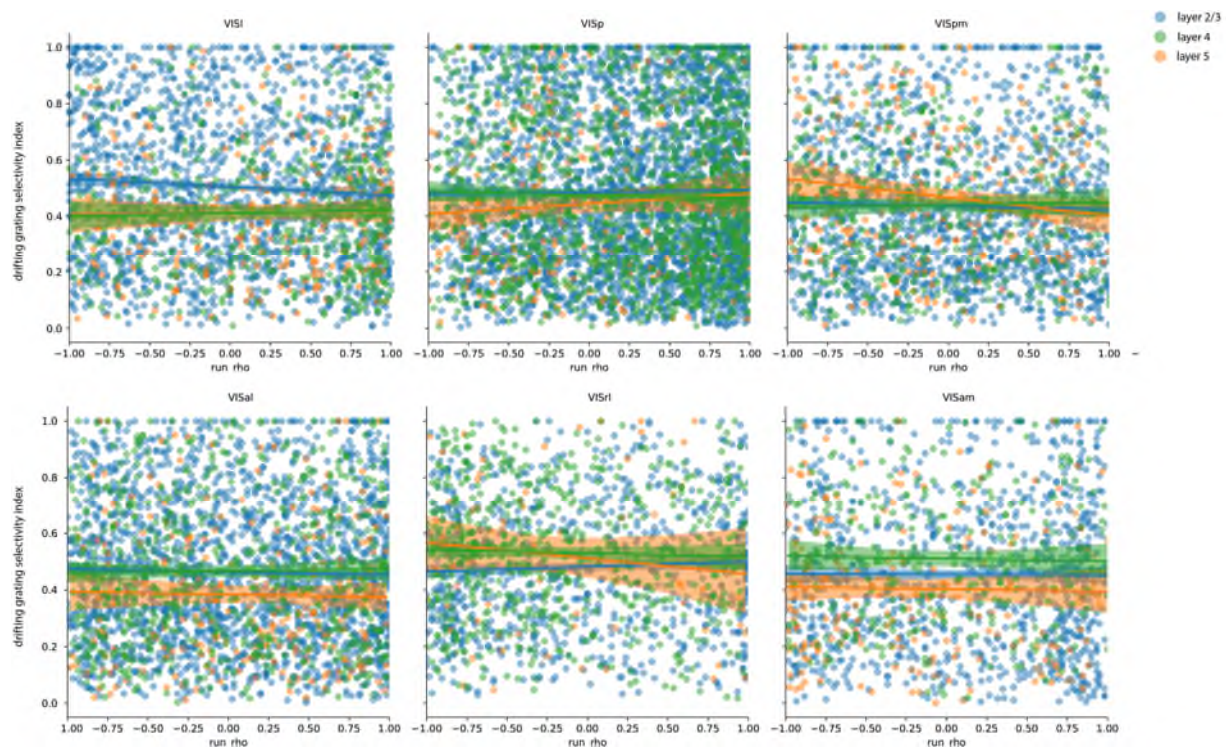

**Supplemental Figure 3.** Correlation between drifting grating selectivity and correlation to running, in all neurons, separated by recording layer. Cell numbers: VISp I23: 2440, I4: 515, I5: 1544, VISI I23: 7052, I4: 277, I5: 2173, VISpm I23 4539, I4 :702, I5: 579. VISal: I2/3 4037, I4 746, I5 643, VISam I23 3027, I4 201, I5 732, VISrl I23 737, I4 41, I5 460

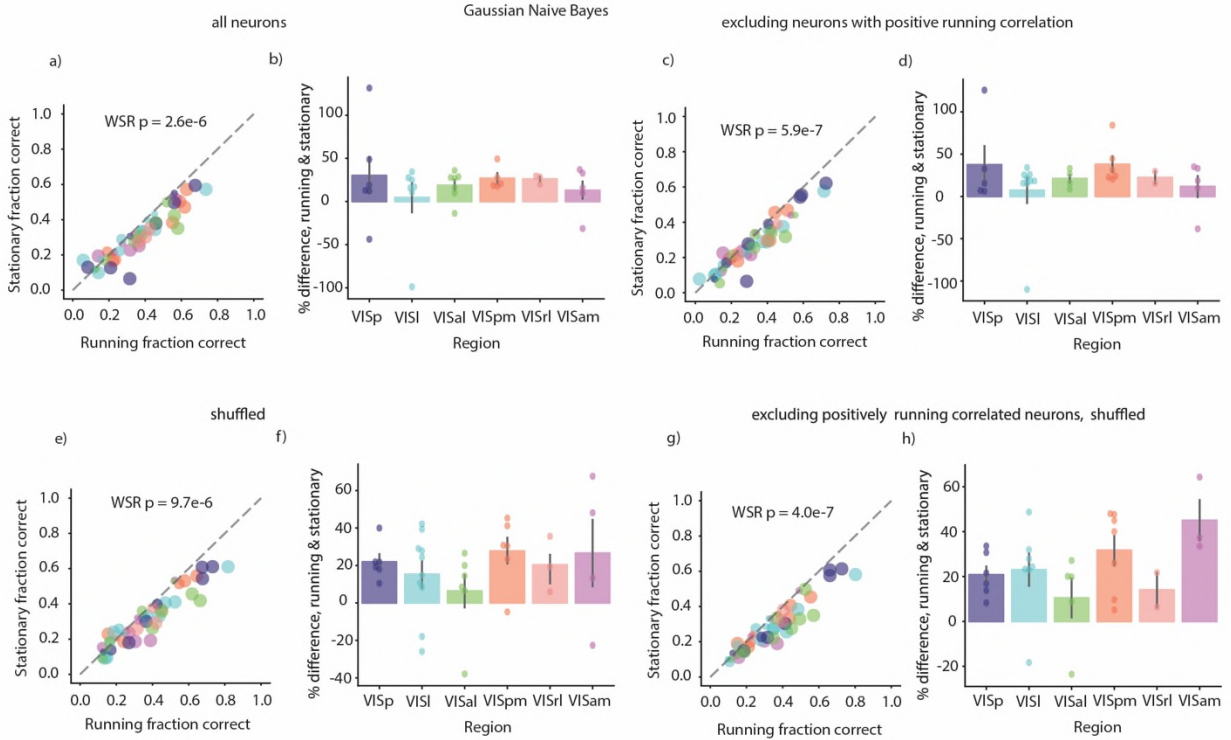

**Supplemental Figure 4** Decoder: Gaussian Naïve Bayes. Decoding performance during running and stationary periods. **a.** Average fraction of correctly classified visual stimuli during running and stationary periods (average over ten 50:50 train/test splits). Each data point is an individual experiment. Colors indicate brain region recorded. **b.** Data from **a** displayed separated into visual regions in dataset, only including experiments in which the difference between running and stationary periods was significant (in either direction). Each dot is an individual experiment. **c,d.** Same as **a, b.** but excluding neurons that increase their activity during running. **e, f.** Same as **a.** but trial-shuffled to remove noise correlations. **g, h.** Same as **a.** but excluding neurons that increase their activity during running and trial-shuffled to remove noise correlations. All statistics Wilcoxon signed rank test. Cell numbers and mouse numbers supplemental table 1. Error bars are 95% confidence intervals on the mean estimate, 1000 bootstraps.

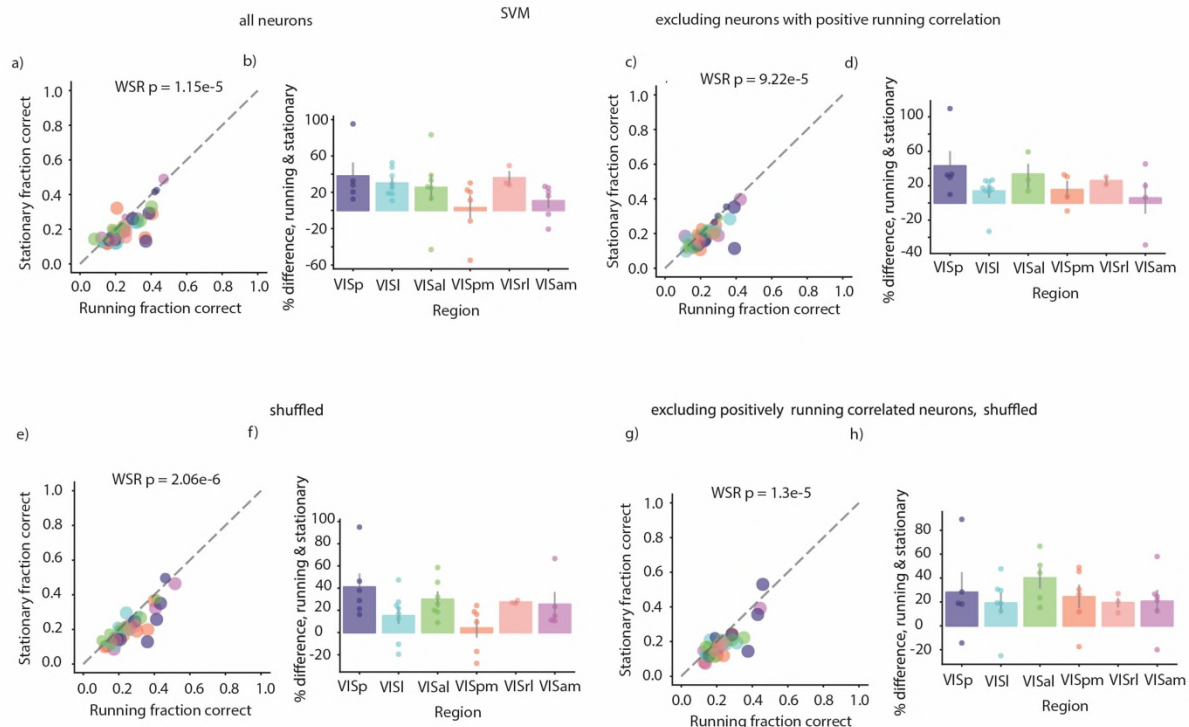

**Supplemental Figure 5.** Decoding performance (SVM Support Vector Machine) during running and stationary periods. **a.** Average fraction of correctly classified visual stimuli during running and stationary periods (average over ten 50:50 train/test splits). Each data point is an individual experiment. Colors indicate brain region recorded. **b.** Data from **a** displayed separated into visual regions in dataset, only including experiments in which the difference between running and stationary periods was significant (in either direction). Each dot is an individual experiment. **c,d.** Same as **a, b**. but excluding neurons that increase their activity during running. **e, f.** Same as **a, b**. but trial-shuffled to remove noise correlations. **g, h.** Same as **a, b**. but excluding neurons that increase their activity during running and trial-shuffled to remove noise correlations. All statistics Wilcoxon signed rank test. Cell numbers and mouse numbers supplemental table 1. Error bars are 95% confidence intervals on the mean estimate, 1000 bootstraps.

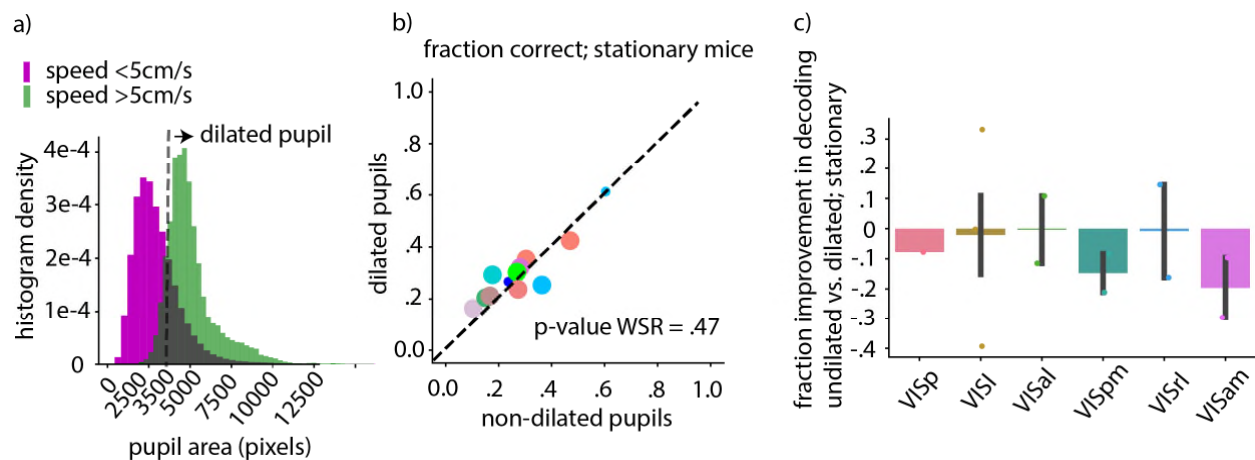

**Supplemental Figure 6.** a) distribution of pupil diameter during running and stationary periods. b) fraction of correctly classified trials comparing periods where mice were stationary and had dilated pupils (defined as pupil area greater than 3500 pixels, the pupil area which separates the running and stationary pupil distributions) and those stationary trials where mice had undilated

pupils. C. Same as b. except broken out by region. In **b**, size of circle represents statistical effect size. Cell numbers and mouse numbers supplemental table 1. Error bars are 95% confidence intervals on the mean estimate, 1000 bootstraps.

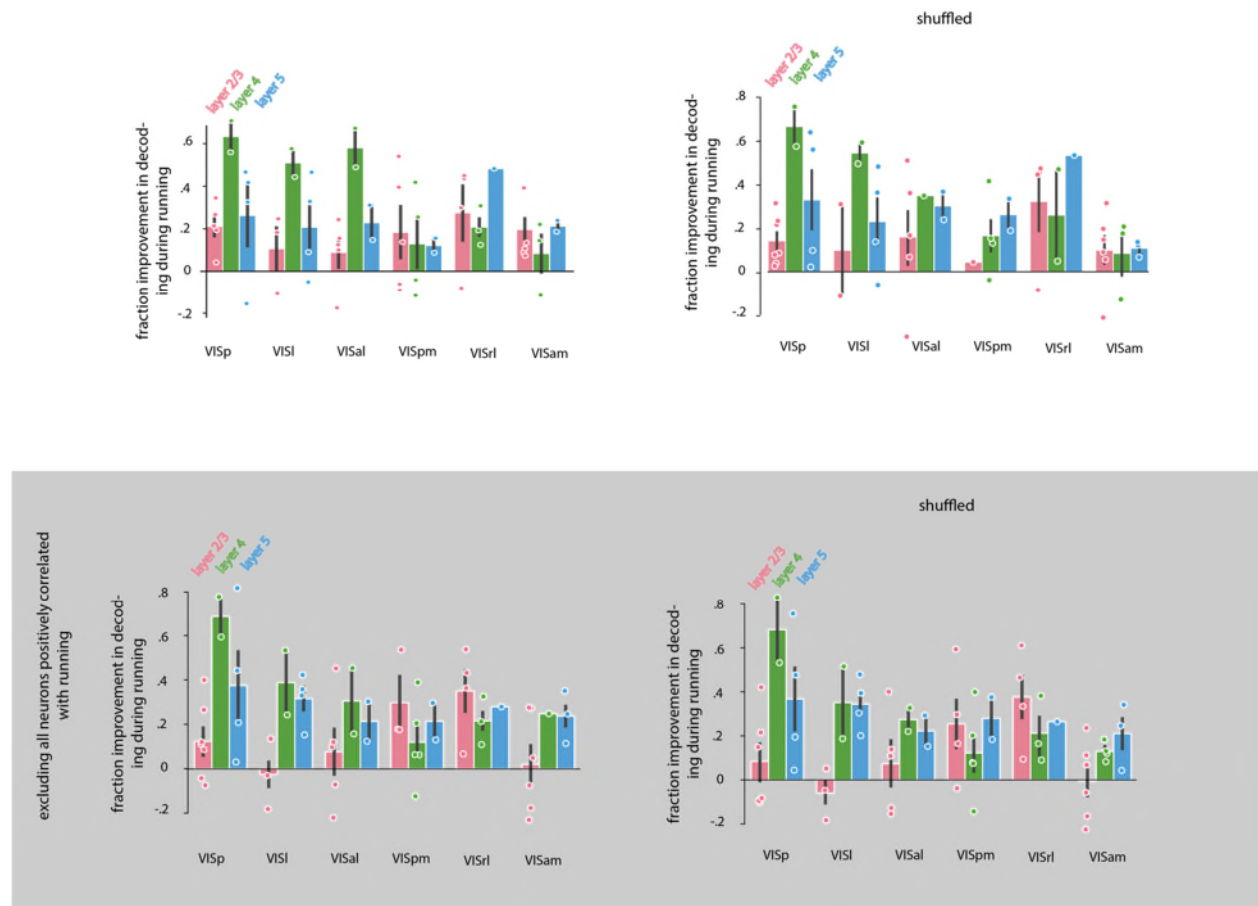

**Supplemental Figure 7.** Difference between running and stationary decoding (same as Figure 3b, etc.) except broken out by visual region and cre-line. Cell numbers and mouse numbers supplemental table 1. Error bars are 95% confidence intervals on the mean estimate, 1000 bootstraps.

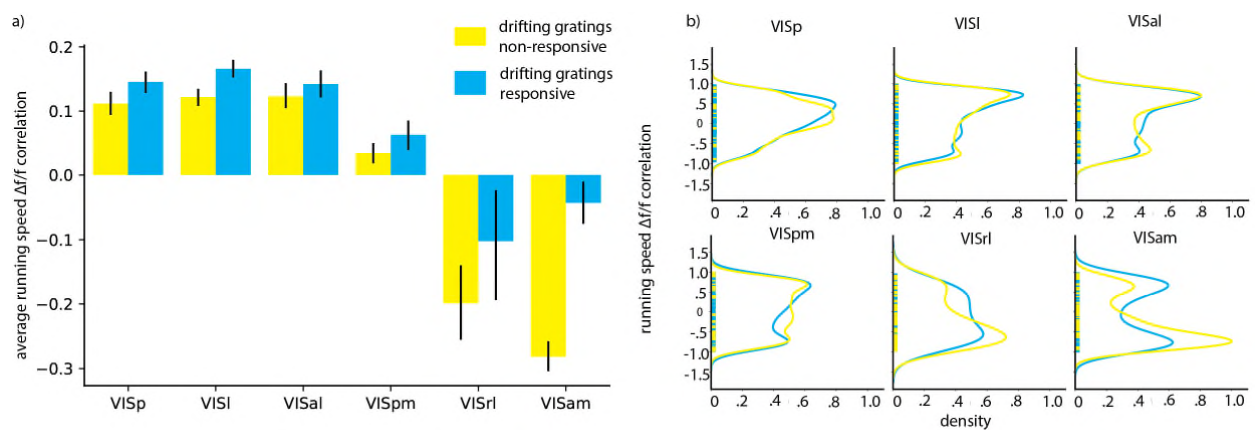

**Supplemental Figure 8.** A) average correlation coefficient between running and neural activity, grouped by responsiveness to drifting gratings. A neuron is considered responsive to drifting

gratings if it passes an Anova with  $p < 0.05$  comparing the distribution of responses to all stimuli, including the blank stimuli, with the null hypothesis that all distributions are the same. (B) the histogram density of running speed – neural activity correlation coefficients, split up by region and responsiveness to the drifting gratings stimuli. Cell numbers: Drifting gratings responsive: VISp 272, VISl 696, VISpm 331, VISrl 39, VISam 390. Drifting gratings non-responsive: VISp 229, VISl 1461, VISpm 806, VISal 88, VISam 652. Error bars are 95% confidence intervals on mean estimate determined by 1000 bootstraps.

| VISp      |         |         |         |         |         |
|-----------|---------|---------|---------|---------|---------|
| layer 2/3 |         | layer 4 |         | layer 5 |         |
| All       | non-pos | All     | non-pos | All     | non-pos |
| 353       | 263     | 79      | 65      | 61      | 52      |
| 292       | 237     | 43      | 36      | 101     | 90      |
| 215       | 110     | 42      | 31      |         |         |
| 266       | 211     | 60      | 51      |         |         |
| 200       | 179     | 100     | 90      |         |         |
| 240       | 160     |         |         |         |         |
| 95        | 58      |         |         |         |         |
|           |         |         |         |         |         |
| VISl      |         |         |         |         |         |
| layer 2/3 |         | layer 4 |         | layer 5 |         |
| All       | non-pos | All     | non-pos | All     | non-pos |
| 188       | 140     | 191     | 113     | 88      | 66      |
| 108       | 81      | 200     | 115     | 52      | 33      |
| 293       | 238     |         |         | 28      | 28      |
| 109       | 60      |         |         | 50      | 37      |
| 253       | 153     |         |         |         |         |
|           |         |         |         |         |         |
| VISal     |         |         |         |         |         |
| layer 2/3 |         | layer 4 |         | layer 5 |         |
| All       | non-pos | All     | non-pos | All     | non-pos |
| 76        | 68      | 89      | 80      | 21      | 15      |
| 159       | 123     | 234     | 206     | 96      | 72      |
| 207       | 144     |         |         |         |         |
| 47        | 43      |         |         |         |         |
| 168       | 158     |         |         |         |         |
|           |         |         |         |         |         |
| VISpm     |         |         |         |         |         |
| layer 2/3 |         | layer 4 |         | layer 5 |         |
| All       | non-pos | All     | non-pos | All     | non-pos |

|                  |                |                |                |                |                |
|------------------|----------------|----------------|----------------|----------------|----------------|
| 128              | 89             | 79             | 65             | 61             | 52             |
| 85               | 70             | 43             | 36             | 101            | 90             |
| 94               | 76             | 42             | 31             |                |                |
| 106              | 81             | 60             | 51             |                |                |
| 232              | 168            | 100            | 90             |                |                |
|                  |                |                |                |                |                |
| <b>VISrl</b>     |                |                |                |                |                |
| <b>layer 2/3</b> |                | <b>layer 4</b> |                | <b>layer 5</b> |                |
| <b>All</b>       | <b>non-pos</b> | <b>All</b>     | <b>non-pos</b> | <b>All</b>     | <b>non-pos</b> |
| 82               | 74             | 261            | 234            | 9              | 8              |
| 34               | 24             | 217            | 207            | 13             | 10             |
| 112              | 100            | 146            | 113            |                |                |
| 125              | 102            |                |                |                |                |
|                  |                |                |                |                |                |
| <b>VISam</b>     |                |                |                |                |                |
| <b>layer 2/3</b> |                | <b>layer 4</b> |                | <b>layer 5</b> |                |
| <b>All</b>       | <b>non-pos</b> | <b>All</b>     | <b>non-pos</b> | <b>All</b>     | <b>non-pos</b> |
| 79               | 66             | 32             | 26             | 75             | 69             |
| 181              | 129            | 93             | 81             | 181            | 129            |
| 239              | 160            | 50             | 38             | 239            | 160            |
| 112              | 87             | 58             | 52             | 112            | 87             |
| 82               | 67             |                |                | 82             | 67             |
| 35               | 27             |                |                | 35             | 27             |
| 118              | 79             |                |                | 118            | 79             |
|                  |                |                |                |                |                |

**Supplemental Table 1:** Cell numbers included in decoding analysis. Each line in each layer is a separately recording experiment, non-pos refers to cell numbers after excluding neurons positively correlated neurons. Thus each entry corresponds to one data point in all decoding analyses.

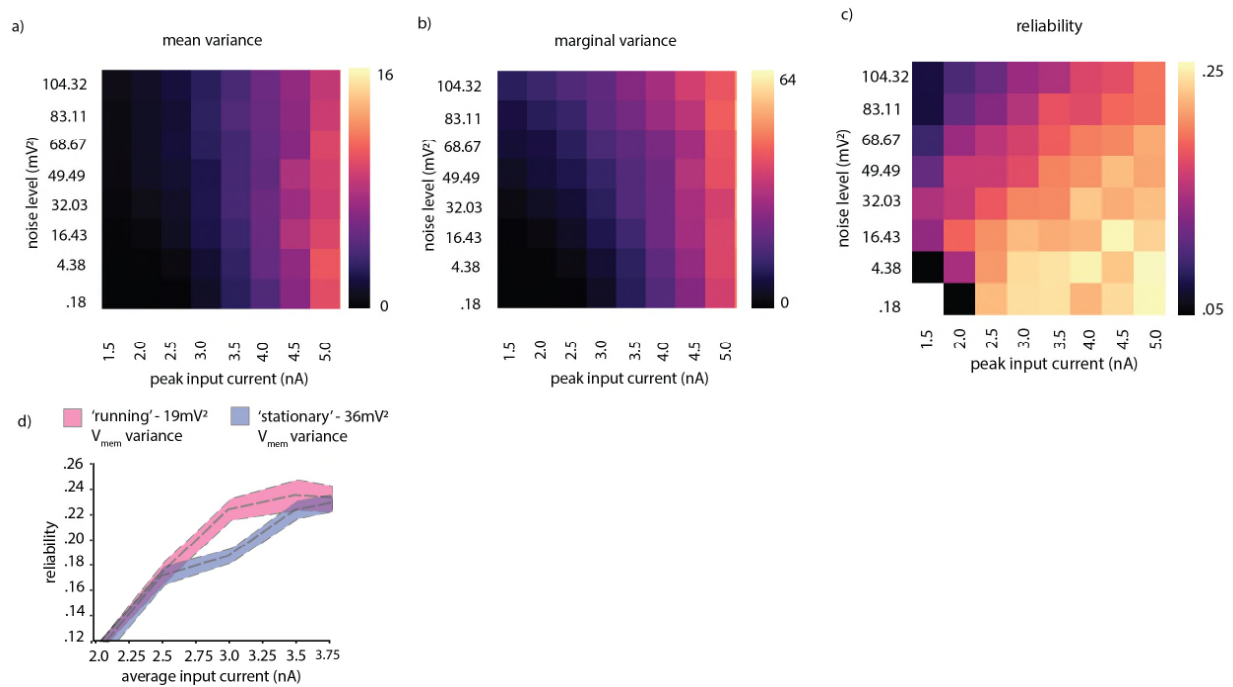

**Supplemental Figure 9** **a.** Variance of class means versus noise level and peak input current in LIF simulations. **b.** Marginal variance versus peak input current and noise level in LIF simulations. **c.** Reliability vs noise level and peak input current. **d.** Reliability vs. average input current during running and stationary noise levels, with resting membrane voltage also adjusted to -68 mV and -70 mV during running and stationary periods, respectively. Each datapoint is averaged over 10 independent re-runs of the model.

VISp Cux2-CreERT2

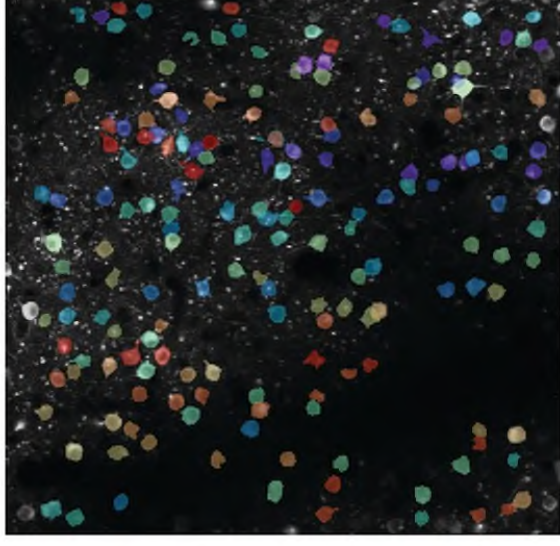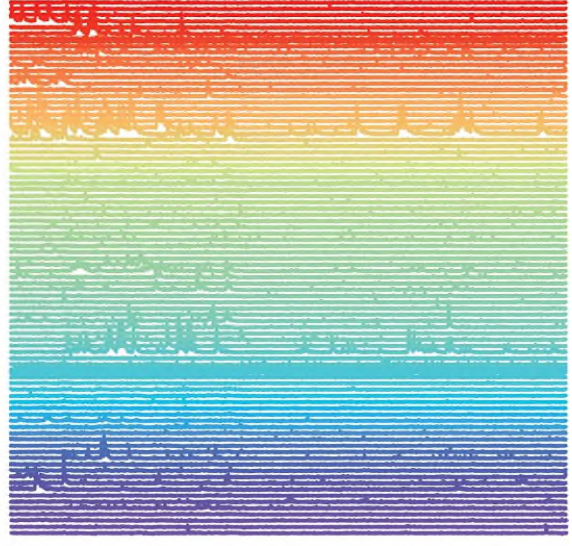

VISI Cux2-CreERT2

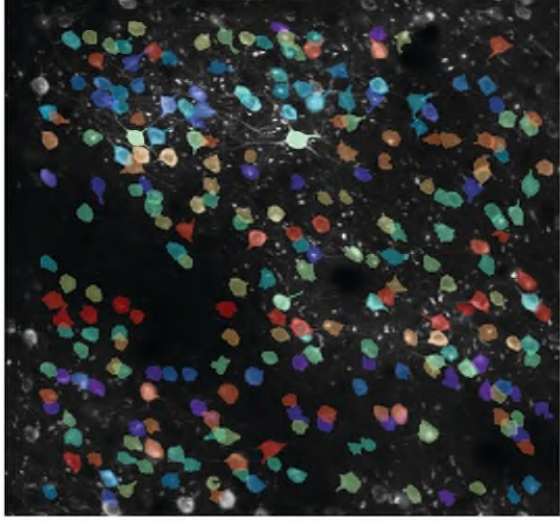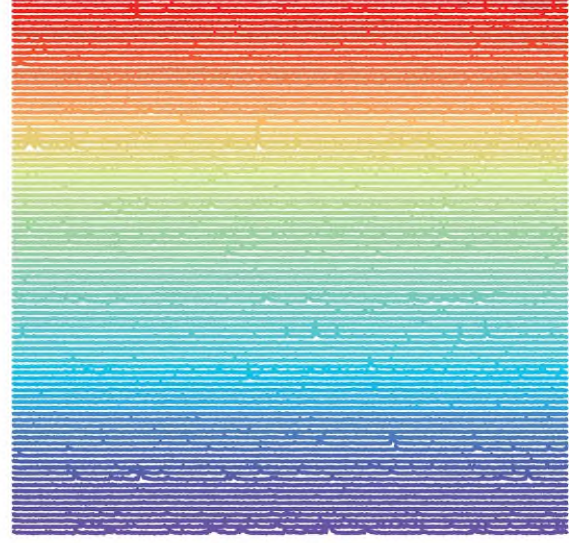

VISal Cux2-CreERT2

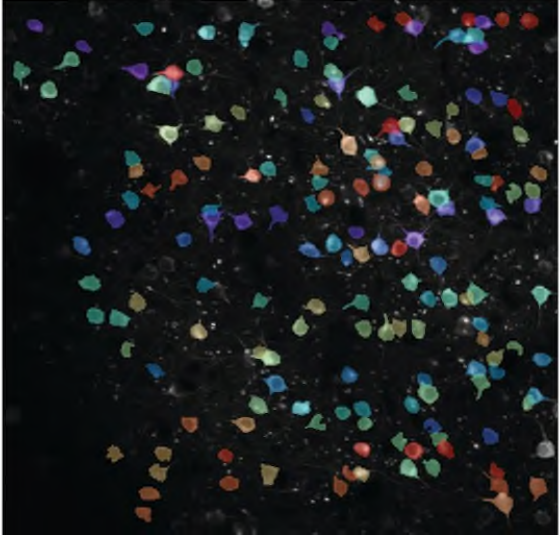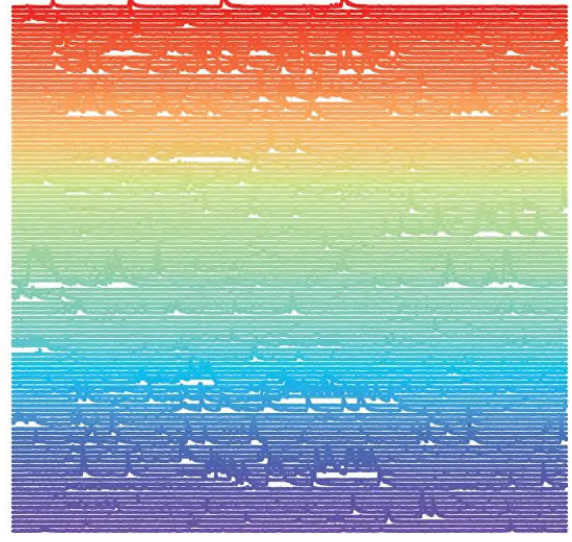

VISp-RORB

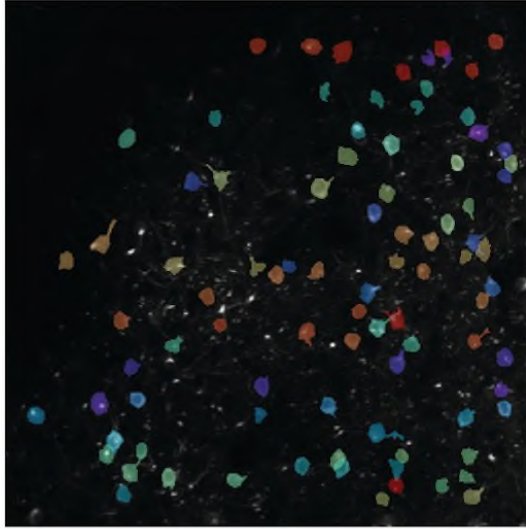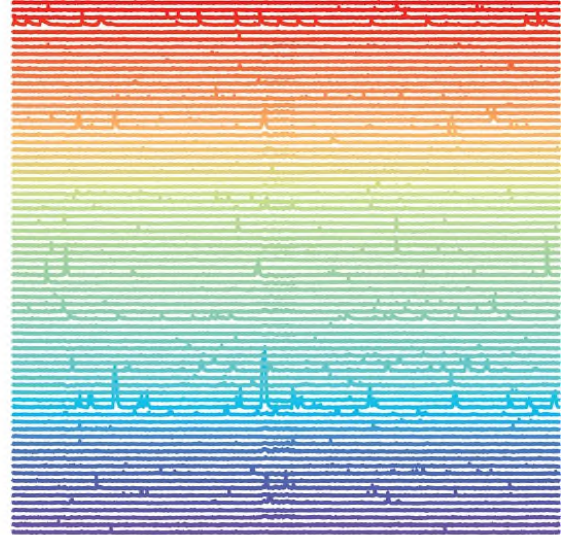

VISI-RORB

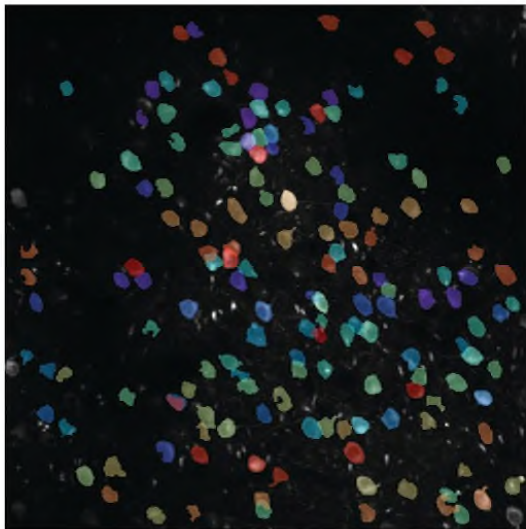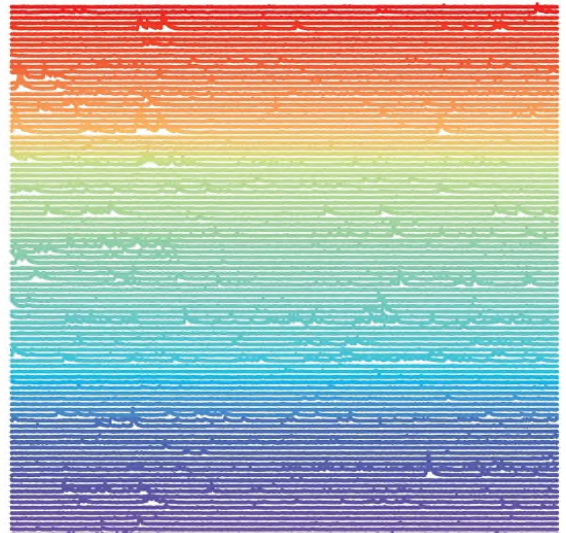

VISal-RORB

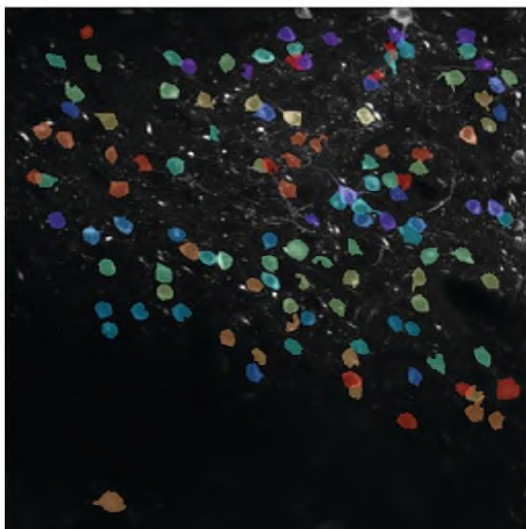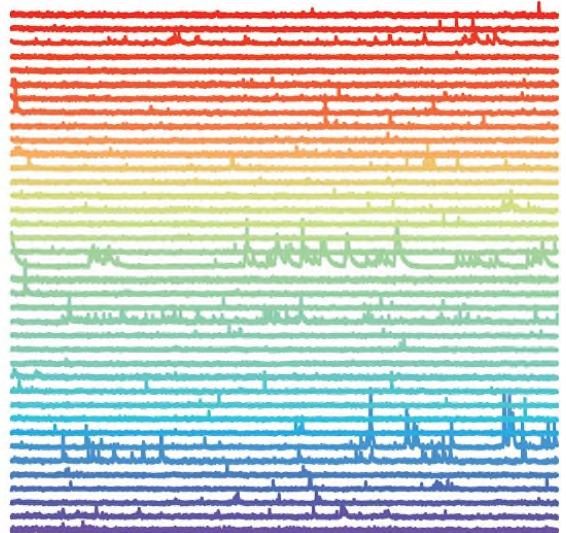

**Supplemental Figure 10.** Example cell traces and ROIs. Colors in cell mask ROI images (left) correspond with colors in cell trace df/f images (right). Each field of view (left) is 512um by 512um.
